# Supplementary material for: SUMOylation of human septins is critical for septin filament bundling and cytokinesis
Source: PubMed Central journal article supplement — J Cell Biol. 2017 Dec 4;216(12):4041–52. doi: 10.1083/jcb.201703096 (PMC5716278; doi:10.1083/jcb.201703096), 2017-12-04
Supplement: JCB_201703096_sm.pdf [file JCB_201703096_sm.pdf]

Ribet et al., <https://doi.org/10.1083/jcb.201703096>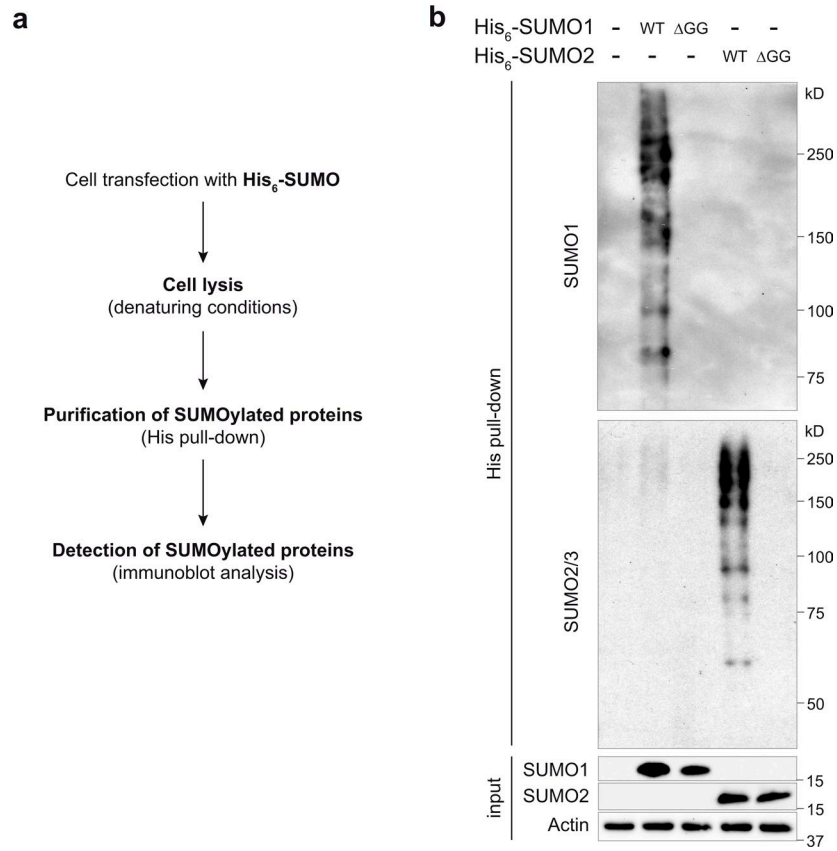

Figure S1. **Septin SUMOylation assay.** (a) Schematic representation of SUMOylated protein detection assay. (b) Immunoblot analysis, using anti-SUMO1 or anti-SUMO2/3 antibodies, of SUMOylated proteins from His pull-down fractions from HeLa cells transfected with WT His<sub>6</sub>-SUMO or nonconjugatable ΔGG mutants. Proteins conjugated to SUMO1 or SUMO2 were detected only when WT His<sub>6</sub>-SUMO1 or His<sub>6</sub>-SUMO2 were expressed, respectively (and not with the corresponding ΔGG mutants). Input fractions are shown as controls.

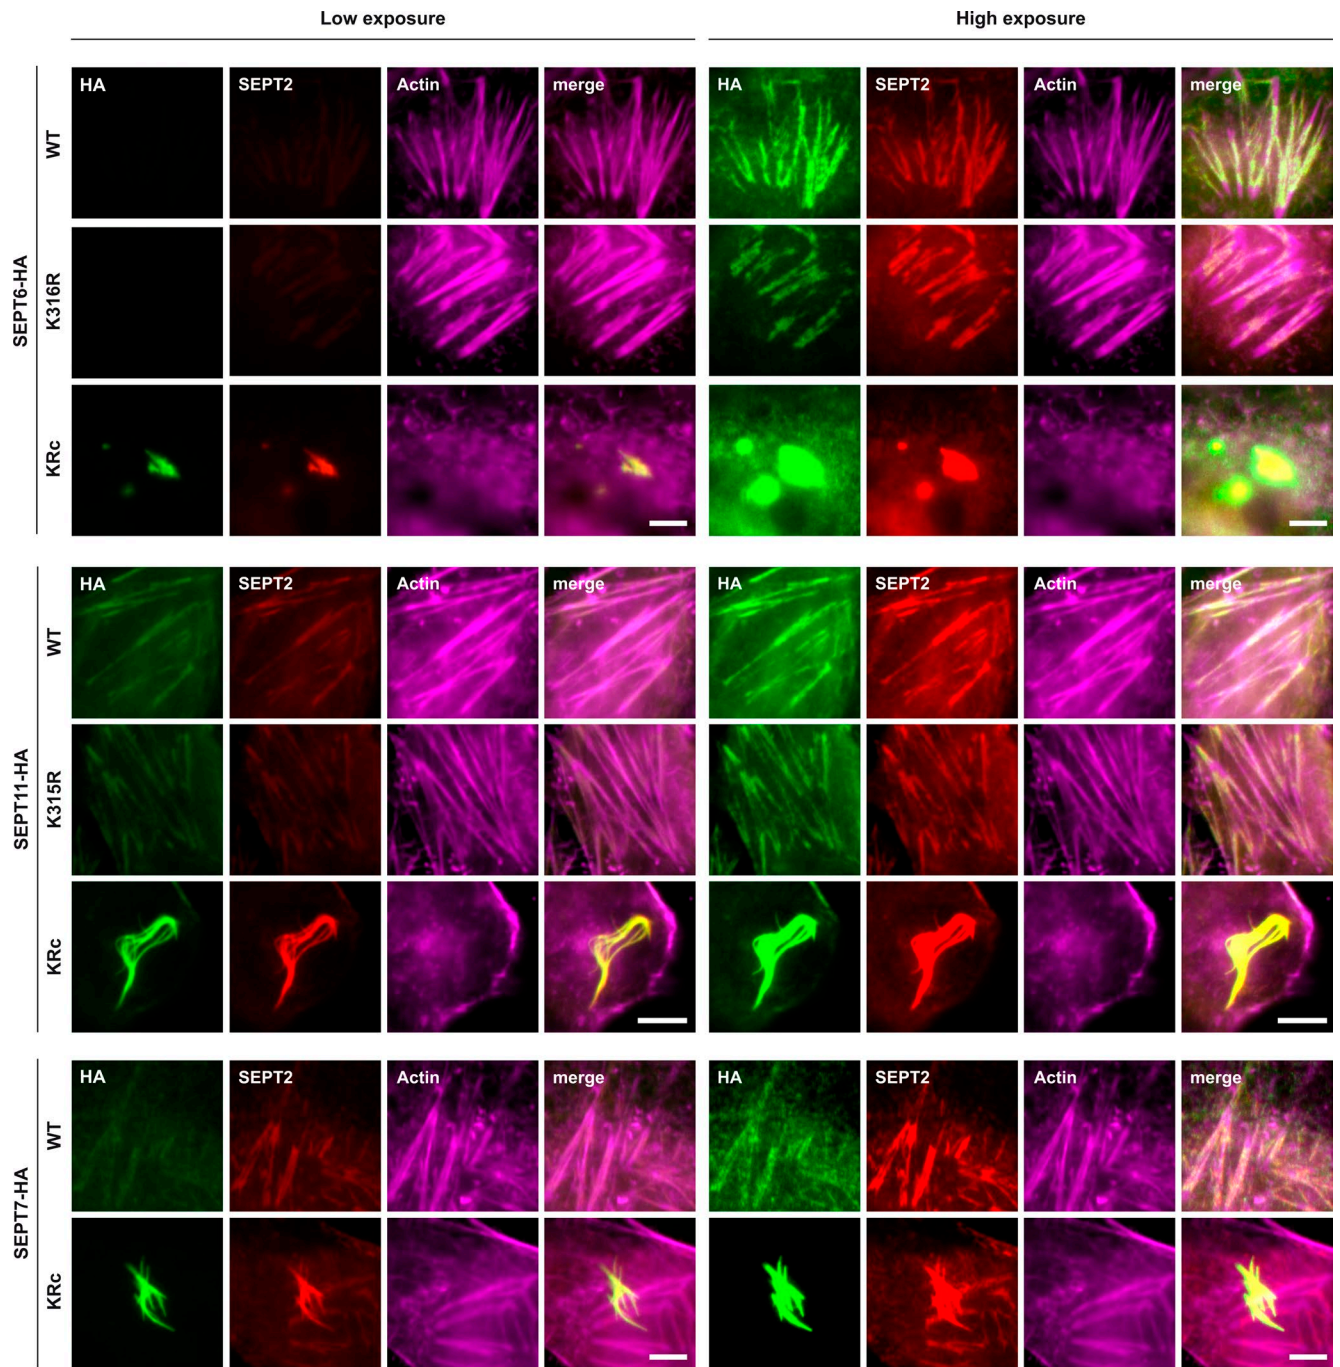

Figure S2. **Colocalization between HA-tagged septins, endogenous SEPT2, and actin filaments.** Fluorescent light microscopy images of HeLa cells transfected with HA-tagged WT or mutant septins. Cells were stained for HA-tagged septins (anti-HA antibodies, green), endogenous SEPT2 (anti-SEPT2 antibodies, red), and actin (phalloidin, magenta). Bars, 5  $\mu$ m. Aberrant bundles formed by non-SUMOylatable septins colocalize with endogenous SEPT2, but not with actin, in contrast to filaments formed by WT septins.

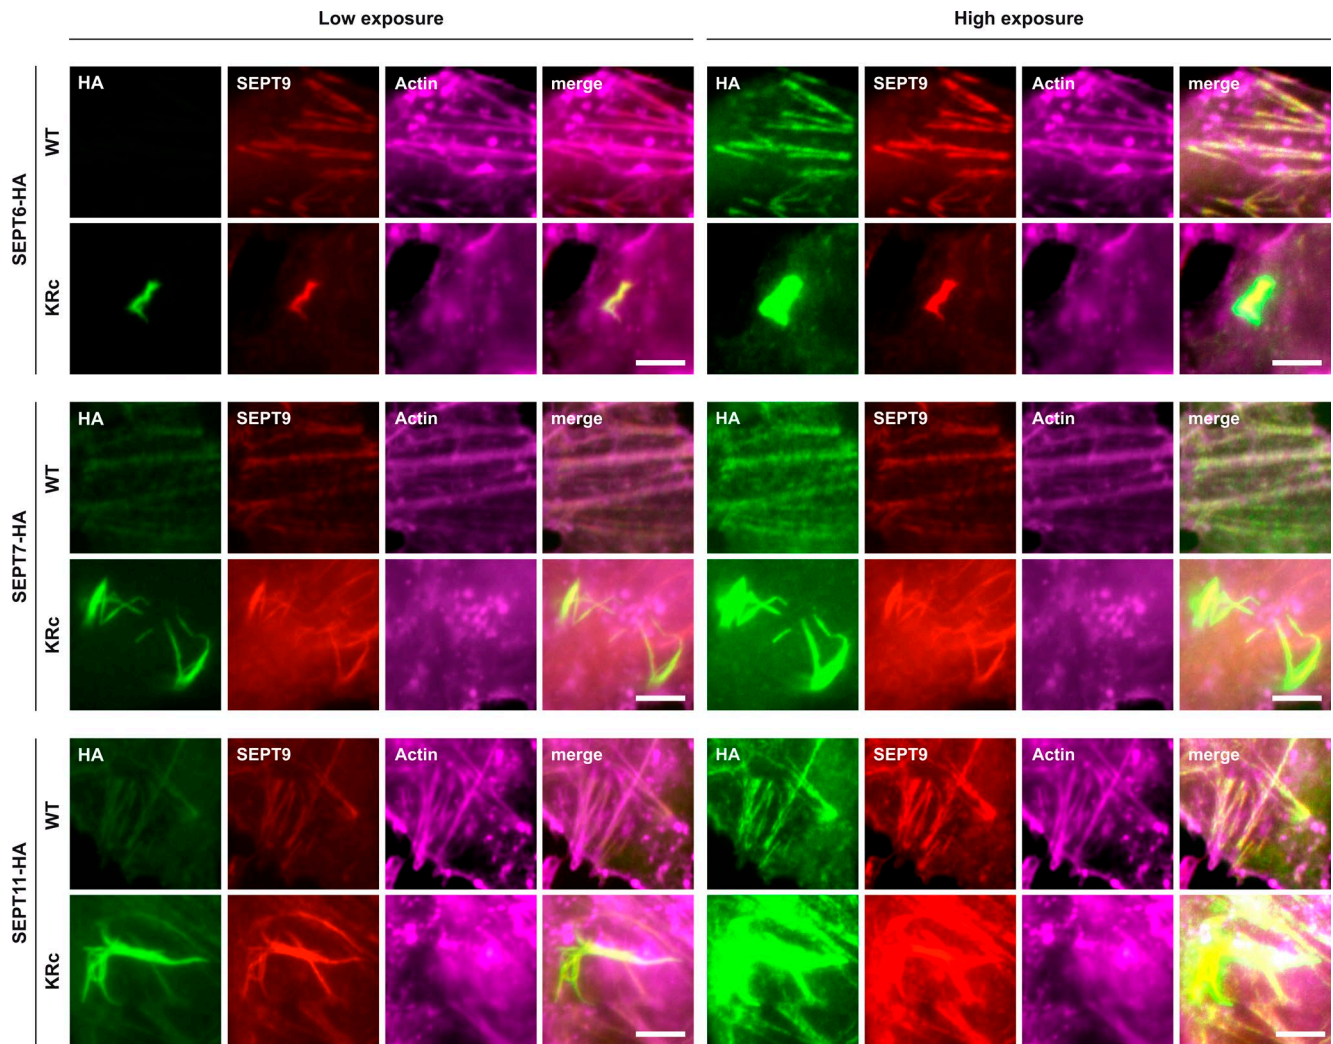

Figure S3. **Colocalization between HA-tagged septins, endogenous SEPT9, and actin filaments.** Fluorescent light microscopy images of HeLa cells transfected with HA-tagged WT or non-SUMOylatable (KRc) septins. Cells were stained for HA-tagged septins (anti-HA antibodies, green), endogenous SEPT9 (anti-SEPT9 antibodies, red), and actin (phalloidin, magenta). Bars, 5  $\mu$ m. Aberrant bundles formed by non-SUMOylatable septins colocalize with endogenous SEPT9, but not with actin, in contrast to filaments formed by WT septins.

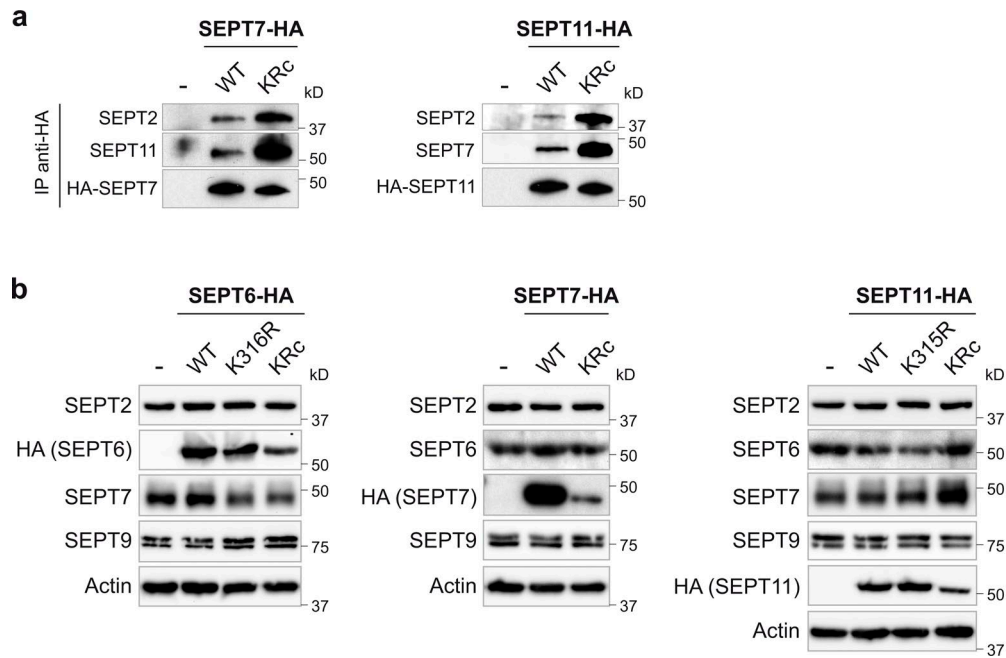

Figure S4. **Coimmunoprecipitation of HA-tagged septins with endogenous septins.** (a) Immunoblot analysis of coimmunoprecipitation experiments between HA-tagged SEPT7 and SEPT11 and endogenous septins. Endogenous septins coimmunoprecipitate with both WT and non-SUMOylatable HA-tagged septins, indicating that a lack of SUMOylation does not inhibit SEPT7 or SEPT11's ability to form complexes with septins from other septin groups. IP, immunoprecipitation. (b) Immunoblot analysis of endogenous septin levels in whole cell lysates from HeLa cells transfected with WT or mutant HA-tagged SEPT6, SEPT7, and SEPT11. Antibodies against SEPT2, SEPT6, SEPT7, and SEPT9 were used to monitor changes in endogenous septin levels. Actin is shown as a loading control. Expression of the different septin mutants does not alter endogenous SEPT2, SEPT6, SEPT7, or SEPT9 protein levels.

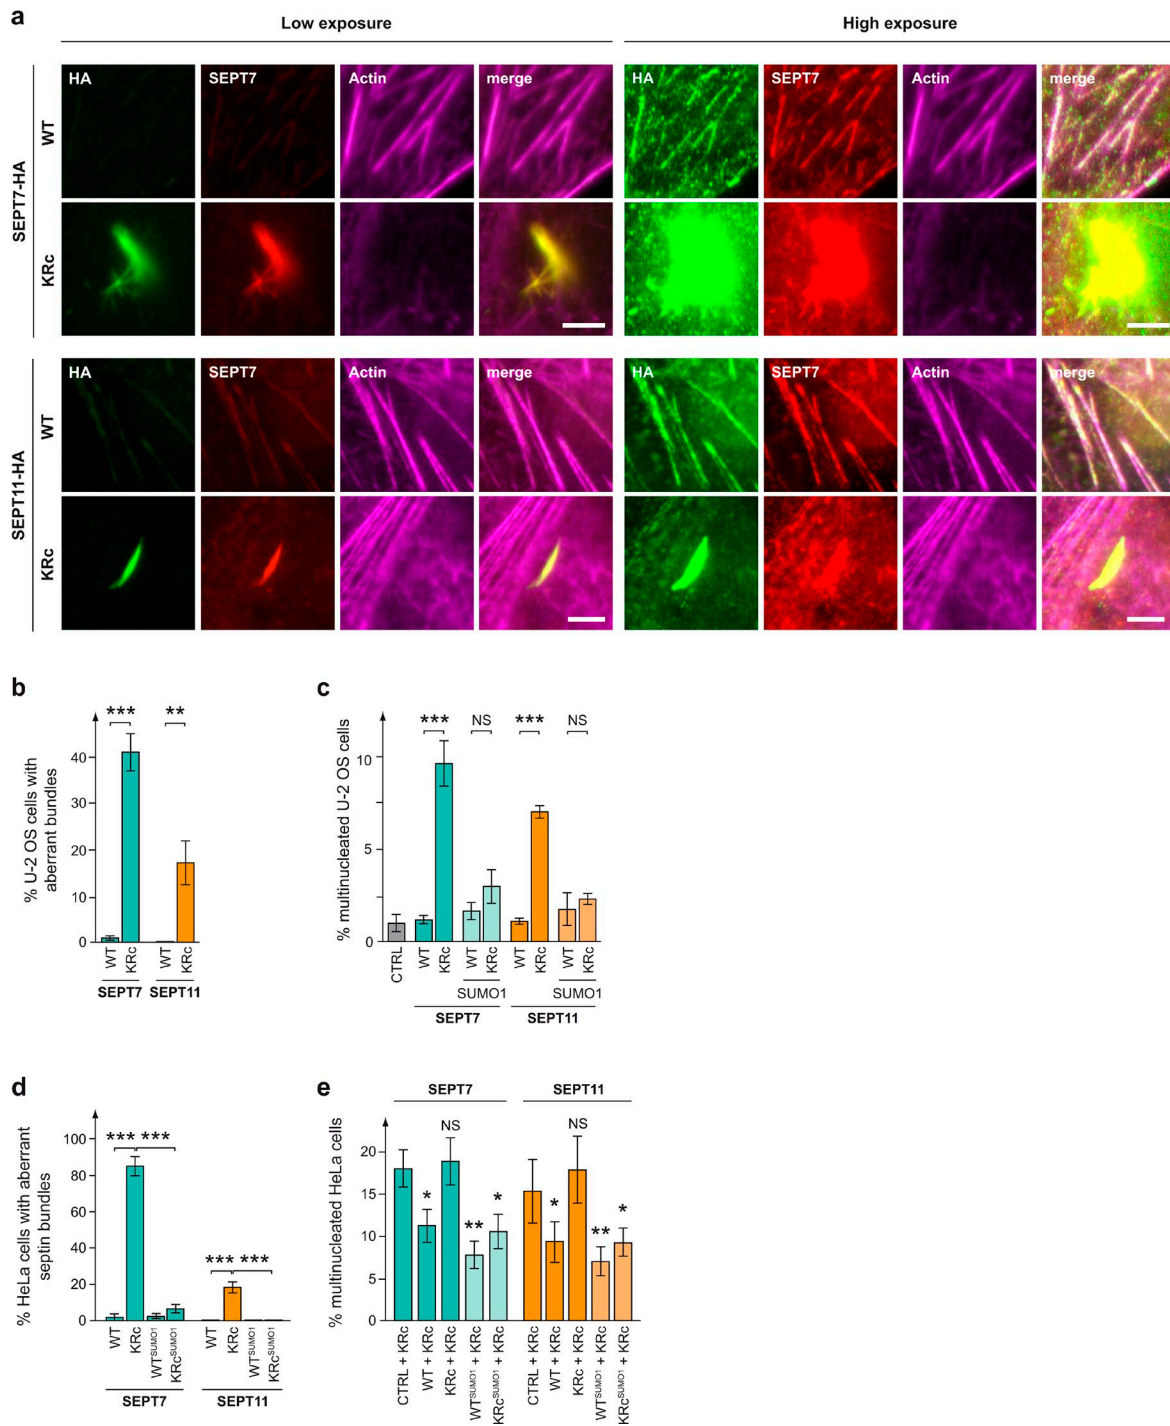

**Figure S5. Lack of SEPT7 and SEPT11 SUMOylation induces cell division defects and aberrant septin bundle formation in HeLa and U-2 OS cells.** (a) Fluorescent light microscopy images of septin filaments in U-2 OS cells transfected with HA-tagged WT or non-SUMOylatable (KRc) SEPT7 and SEPT11 variants. Cells were stained with HA-tagged septins (anti-HA antibodies, green), endogenous septins (anti-SEPT7 antibodies, red), and actin (phalloidin, magenta). Bars, 5  $\mu$ m. (b) Percentage of U-2 OS cells exhibiting aberrant septin bundles after transfection with WT or mutant SEPT7 or SEPT11. (c) Percentage of U-2 OS cells exhibiting multinucleation after transfection with SEPT7 and SEPT11 variants. As already observed in HeLa cells, expression of non-SUMOylatable SEPT7 and SEPT11 variants leads to the formation of aberrant septin bundles, which colocalize with endogenous SEPT7, and to cytokinesis defects resulting in the formation of multinucleated cells. These phenotypes can be reverted by the artificial fusion of SUMO at the end of SEPT7 and SEPT11 non-SUMOylatable variants, highlighting the essential role of septin SUMOylation in both filament organization and cytokinesis in U-2 OS cells. (d) Percentage of HeLa cells displaying aberrant septin bundles after transfection with WT, non-SUMOylatable, or constitutively SUMOylated SEPT7 and SEPT11. Constitutively SUMOylated SEPT7 and SEPT11 variants do not form aberrant septin bundles in contrast to non-SUMOylatable variants. (e-d) Mean from three independent experiments. (e) Percentage of HeLa cells exhibiting multinucleation after cotransfection with equivalent amount of expression vectors for non-SUMOylatable SEPT KRc mutant and either control plasmid (pCDNA.3; CTRL) or WT, KRc, WT<sup>SUMO1</sup>, or KRc<sup>SUMO1</sup> septin variants (mean from three to five experiments; error bars, SD; \*  $P < 0.05$ ; \*\*  $P < 0.01$ ; \*\*\*  $P < 0.001$ ). Cotransfection of SEPT KRc<sup>SUMO1</sup> septin variants partially restores the cell division defects induced by SEPT KRc mutants alone. This indicates that constitutively SUMOylated septins can functionally restore defects induced by non-SUMOylatable septin mutants.

Table S1. Bioinformatic search for SIMs

| Septin           | UniProt accession number | Isoform <sup>a</sup> | Nb SIM with score <6 <sup>b</sup> | Nb SIM with score >6 <sup>b</sup> | Best score <sup>c</sup> |
|------------------|--------------------------|----------------------|-----------------------------------|-----------------------------------|-------------------------|
| SEPT1            | Q8WYJ6                   | Isoform 1            | 2                                 | 0                                 | 2.957                   |
|                  |                          | Isoform 2            | 1                                 | 0                                 | 2.587                   |
| SEPT2            | Q15019                   | Isoform 1            | 3                                 | 0                                 | 3.978                   |
|                  |                          | Isoform 2            | 3                                 | 0                                 | 3.978                   |
| SEPT3            | Q9UH03                   | Isoform 1            | 3                                 | 0                                 | 3.609                   |
|                  |                          | Isoform 2            | 3                                 | 0                                 | 3.609                   |
|                  |                          | Isoform 3            | 1                                 | 0                                 | 2.587                   |
| SEPT4            | O43236                   | Isoform 1            | 0                                 | 0                                 | –                       |
|                  |                          | Isoform 2            | 0                                 | 0                                 | –                       |
|                  |                          | Isoform 3            | 0                                 | 0                                 | –                       |
|                  |                          | Isoform 4            | 1                                 | 0                                 | 3.022                   |
|                  |                          | Isoform 5            | 0                                 | 0                                 | –                       |
| SEPT5            | Q99719                   | Isoform 1            | 5                                 | 0                                 | 2.978                   |
|                  |                          | Isoform 2            | 4                                 | 0                                 | 2.978                   |
| SEPT6            | Q14141                   | Isoform ii           | 2                                 | 0                                 | 3.739                   |
|                  |                          | Isoform i            | 2                                 | 0                                 | 3.739                   |
|                  |                          | Isoform iv           | 2                                 | 0                                 | 3.739                   |
|                  |                          | Isoform v            | 2                                 | 0                                 | 3.739                   |
| SEPT7            | Q16181                   | Isoform 1            | 5                                 | 0                                 | 5.130                   |
|                  |                          | Isoform 2            | 5                                 | 0                                 | 5.130                   |
| SEPT8            | Q92599                   | Isoform 1            | 3                                 | 0                                 | 3.739                   |
|                  |                          | Isoform 2            | 3                                 | 0                                 | 3.739                   |
|                  |                          | Isoform 3            | 3                                 | 0                                 | 3.739                   |
| SEPT9            | Q9UHD8                   | Isoform 1            | 4                                 | 0                                 | 3.696                   |
|                  |                          | Isoform 2            | 4                                 | 0                                 | 3.696                   |
|                  |                          | Isoform 3            | 3                                 | 0                                 | 3.283                   |
|                  |                          | Isoform 4            | 3                                 | 0                                 | 3.283                   |
|                  |                          | Isoform 5            | 4                                 | 0                                 | 3.696                   |
|                  |                          | Isoform 7            | 4                                 | 0                                 | 3.696                   |
|                  |                          | Isoform 8            | 4                                 | 0                                 | 3.761                   |
| SEPT10           | Q9P0V9                   | Isoform 1            | 2                                 | 0                                 | 3.413                   |
|                  |                          | Isoform 2            | 2                                 | 0                                 | 3.413                   |
|                  |                          | Isoform 3            | 2                                 | 0                                 | 3.413                   |
| SEPT11           | Q9NVA2                   | Isoform 1            | 3                                 | 0                                 | 3.739                   |
|                  |                          | Isoform 2            | 3                                 | 0                                 | 3.739                   |
| SEPT12           | Q8IYM1                   | Isoform 1            | 5                                 | 0                                 | 4.739                   |
|                  |                          | Isoform 2            | 4                                 | 0                                 | 4.739                   |
| SEPT14           | Q6ZU15                   | Isoform 1            | 2                                 | 0                                 | 3.587                   |
| PML <sup>d</sup> | P29590                   | Isoform i            | 0                                 | 1                                 | 10.739                  |

Dashes, not applicable.

<sup>a</sup>Isoform reference according to the UniProt database.

<sup>b</sup>Number of predicted SIMs according to GPS-SBM 1.0 software (<http://sumosp.biocuckoo.org>; score threshold: 2.5). Only predicted SIMs with scores >6 are considered to be confident.

<sup>c</sup>Score of the best SIM predicted.

<sup>d</sup>Example of a protein with one established functional SIM (Shen et al., 2006).

Table S2. **Plasmids used in this study**

| Reference | Name                            | Gene (UniProt ID)                  | Mutation                                                                                                                 | Tag                       | Origin              |
|-----------|---------------------------------|------------------------------------|--------------------------------------------------------------------------------------------------------------------------|---------------------------|---------------------|
| BUG 3452  | pCDNA3-FLAG-Ubc9                | <i>Ubc9</i>                        |                                                                                                                          | FLAG (N-term)             | This study          |
| BUG 3127  | pSG5-His <sub>6</sub> SUMO1 WT  | <i>SUMO1</i>                       |                                                                                                                          | His <sub>6</sub> (N-term) | Impens et al., 2014 |
| BUG 3100  | pSG5-His <sub>6</sub> SUMO1 ΔGG | <i>SUMO1</i>                       | ΔGG                                                                                                                      | His <sub>6</sub> (N-term) | This study          |
| BUG 3128  | pSG5-His <sub>6</sub> SUMO2 WT  | <i>SUMO2</i>                       |                                                                                                                          | His <sub>6</sub> (N-term) | Impens et al., 2014 |
| BUG 3129  | pSG5-His <sub>6</sub> SUMO2 ΔGG | <i>SUMO2</i>                       | ΔGG                                                                                                                      | His <sub>6</sub> (N-term) | This study          |
| BUG 3101  | pCDNA3-SEPT2 WT-HA              | <i>SEPT2</i> isoform I (Q15019-1)  |                                                                                                                          | HA (C-term)               | This study          |
| BUG 3453  | pCDNA3-SEPT2 KRn-HA             | <i>SEPT2</i> isoform I (Q15019-1)  | K3R                                                                                                                      | HA (C-term)               | This study          |
| BUG 3409  | pCDNA3-SEPT2 KRc-HA             | <i>SEPT2</i> isoform I (Q15019-1)  | K310, 318, 325R                                                                                                          | HA (C-term)               | This study          |
| BUG 3102  | pCDNA3-SEPT6 WT-HA              | <i>SEPT6</i> isoform II (Q14141-1) |                                                                                                                          | HA (C-term)               | This study          |
| BUG 3373  | pCDNA3-SEPT6 K316R-HA           | <i>SEPT6</i> isoform II (Q14141-1) | K316R                                                                                                                    | HA (C-term)               | This study          |
| BUG 3374  | pCDNA3-SEPT6 KRc-HA             | <i>SEPT6</i> isoform II (Q14141-1) | K316, 327, 337, 338, 351, 353, 358, 362, 367, 372, 373, 379, 380, 381, 385, 386, 387, 397, 400, 420, 423, 425, 426R      | HA (C-term)               | This study          |
| BUG 3105  | pCDNA3-SEPT7 WT-HA              | <i>SEPT7</i> isoform I (Q16181-1)  |                                                                                                                          | HA (C-term)               | This study          |
| BUG 3375  | pCDNA3-SEPT7 KRc-HA             | <i>SEPT7</i> isoform I (Q16181-1)  | K313, 326, 328, 333, 349, 351, 352, 364, 366, 368, 371, 373, 387, 388, 395, 400, 408, 429, 431, 432, 433, 435R           | HA (C-term)               | This study          |
| BUG 3383  | pCDNA3-SEPT7 WT-HA-SUMO1        | <i>SEPT7</i> isoform I (Q16181-1)  | SEPT7 WT fused to SUMO1 in C-term                                                                                        | HA (C-term)               | This study          |
| BUG 3384  | pCDNA3-SEPT7 KRc-HA-SUMO1       | <i>SEPT7</i> isoform I (Q16181-1)  | SEPT7 KRc fused to SUMO1 in C-term                                                                                       | HA (C-term)               | This study          |
| BUG 3107  | pCDNA3-SEPT9 WT-HA              | <i>SEPT9</i> isoform I (Q9UHD8-1)  |                                                                                                                          | HA (C-term)               | This study          |
| BUG 3412  | pCDNA3-SEPT9 KRn-HA             | <i>SEPT9</i> isoform I (Q9UHD8-1)  | K2, 3, 28, 62, 69, 87, 99, 117, 133, 141, 156, 171, 186, 194, 226, 262, 271R                                             | HA (C-term)               | This study          |
| BUG 3411  | pCDNA3-SEPT9 KRc-HA             | <i>SEPT9</i> isoform I (Q9UHD8-1)  | K579R                                                                                                                    | HA (C-term)               | This study          |
| BUG 3108  | pCDNA3-SEPT11 WT-HA             | <i>SEPT11</i> isoform I (Q9NVA2-1) |                                                                                                                          | HA (C-term)               | This study          |
| BUG 3376  | pCDNA3-SEPT11 K315R-HA          | <i>SEPT11</i> isoform I (Q9NVA2-1) | K315R                                                                                                                    | HA (C-term)               | This study          |
| BUG 3377  | pCDNA3-SEPT11 KRn+m-HA          | <i>SEPT11</i> isoform I (Q9NVA2-1) | K34, 54, 65, 81, 95, 110, 115, 134, 136, 162, 170, 171, 175, 184, 190, 195, 197, 199, 244, 248, 251, 272, 301, 308R      | HA (C-term)               | This study          |
| BUG 3378  | pCDNA3-SEPT11 KRc-HA            | <i>SEPT11</i> isoform I (Q9NVA2-1) | K315, 326, 336, 337, 350, 352, 357, 361, 366, 371, 378, 379, 380, 384, 385, 386, 397, 398, 399, 418, 419, 421, 423, 424R | HA (C-term)               | This study          |
| BUG 3387  | pCDNA3-SEPT11 WT-HA-SUMO1       | <i>SEPT11</i> isoform I (Q9NVA2-1) | SEPT11 WT fused to SUMO1 in C-term                                                                                       | HA                        | This study          |
| BUG 3388  | pCDNA3-SEPT11 KRc-HA-SUMO1      | <i>SEPT11</i> isoform I (Q9NVA2-1) | SEPT11 KRc fused to SUMO1 in C-term                                                                                      | HA                        | This study          |
| BUG 3471  | pCDNA3-SEPT11 WT-HA-SUMO2       | <i>SEPT11</i> isoform I (Q9NVA2-1) | SEPT11 WT fused to SUMO2 in C-term                                                                                       | HA                        | This study          |
| BUG 3472  | pCDNA3-SEPT11 KRc-HA-SUMO2      | <i>SEPT11</i> isoform I (Q9NVA2-1) | SEPT11 KRc fused to SUMO2 in C-term                                                                                      | HA                        | This study          |
| BUG 4169  | pGFP-SEPT11 WT                  | <i>SEPT11</i> isoform I (Q9NVA2-1) |                                                                                                                          | GFP (N-term)              | This study          |
| BUG 4170  | pGFP-SEPT11 KRc                 | <i>SEPT11</i> isoform I (Q9NVA2-1) | K315, 326, 336, 337, 350, 352, 357, 361, 366, 371, 378, 379, 380, 384, 385, 386, 397, 398, 399, 418, 419, 421, 423, 424R | GFP (N-term)              | This study          |

Table S3. Primary antibody information

| Targeted protein    | Assay (dilution)           | Species | Source                     | Reference                       |
|---------------------|----------------------------|---------|----------------------------|---------------------------------|
| HA tag              | WB (1:1,000)<br>IF (1:200) | Mouse   | Cell Signaling Technology  | 6E2; 2367                       |
| HA tag              | WB (1:1,000)               | Rabbit  | Santa Cruz Biotechnologies | Y11; sc-805                     |
| FLAG                | WB (1:1,000)               | Mouse   | Sigma-Aldrich              | M2; F3165                       |
| Ubc9                | WB (1:5,000)               | Rabbit  | Homemade                   | R202; this study                |
| SUMO1               | WB (1:1,000)               | Rabbit  | Cell Signaling Technology  | 4930                            |
|                     | WB (1:1,000)               | Rabbit  | Homemade                   | R204; Ribet et al., 2017        |
| SUMO2/3             | WB (1:5,000)               | Rabbit  | Homemade                   | R205; Ribet et al., 2017        |
| RanGAP1             | WB (1:1,000)               | Rabbit  | Sigma-Aldrich              | R0155                           |
| Actin               | WB (1:10,000)              | Mouse   | Sigma-Aldrich              | AC-15; R5441                    |
| SEPT2               | WB (1:1,000)               | Rabbit  | Homemade                   | R170; Mostowy et al., 2010      |
|                     | IF (1:200)                 |         |                            |                                 |
| SEPT6               | WB (1:1,000)               | Rabbit  | Homemade                   | R136; this study                |
| SEPT7               | WB (1:1,000)               | Rabbit  | Homemade                   | R171; Mostowy et al., 2010      |
|                     | IF (1:200)                 |         |                            |                                 |
| SEPT9               | WB (1:1,000)               | Rabbit  | Homemade                   | R69; Pizarro-Cerdá et al., 2002 |
|                     | IF (1:200)                 |         |                            |                                 |
| SEPT11              | WB (1:1,000)               | Rabbit  | Homemade                   | R274; this study                |
| KIF20A/Rabkinesin-6 | IF (1:500)                 | Rabbit  | Homemade                   | Echard et al., 1998             |

WB, Western blot; IF, immunofluorescence.

## References

- Echard, A., F. Jollivet, O. Martinez, J.J. Lacapère, A. Rousselet, I. Janoueix-Lerosey, and B. Goud. 1998. Interaction of a Golgi-associated kinesin-like protein with Rab6. *Science*. 279:580–585. <https://doi.org/10.1126/science.279.5350.580>
- Impens, F., L. Radoshevich, P. Cossart, and D. Ribet. 2014. Mapping of SUMO sites and analysis of SUMOylation changes induced by external stimuli. *Proc. Natl. Acad. Sci. USA*. 111:12432–12437. <https://doi.org/10.1073/pnas.1413825111>
- Mostowy, S., M. Bonazzi, M.A. Hamon, T.N. Tham, A. Mallet, M. Lelek, E. Gouin, C. Demangel, R. Brosch, C. Zimmer, et al. 2010. Entrapment of intracytosolic bacteria by septin cage-like structures. *Cell Host Microbe*. 8:433–444. <https://doi.org/10.1016/j.chom.2010.10.009>
- Pizarro-Cerdá, J., R. Jonquière, E. Gouin, J. Vandekerckhove, J. Garin, and P. Cossart. 2002. Distinct protein patterns associated with *Listeria monocytogenes* InIA- or InIB-phagosomes. *Cell. Microbiol.* 4:101–115. <https://doi.org/10.1046/j.1462-5822.2002.00169.x>
- Ribet, D., V. Lallemand-Breitenbach, O. Ferhi, M.A. Nahori, H. Varet, H. de Thé, and P. Cossart. 2017. Promyelocytic Leukemia Protein (PML) Controls *Listeria monocytogenes* Infection. *MBio*. 8:e02179-16. <https://doi.org/10.1128/mBio.02179-16>
- Shen, T.H., H.K. Lin, P.P. Scaglioni, T.M. Yung, and P.P. Pandolfi. 2006. The mechanisms of PML-nuclear body formation. *Mol. Cell*. 24:331–339. <https://doi.org/10.1016/j.molcel.2006.09.013>
